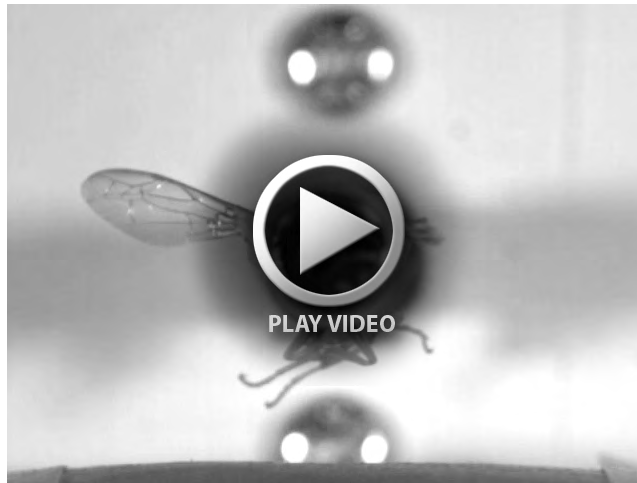

**Movie 1. An unsplinted yellowjacket wing subject to wing wear testing.** The wing naturally flexes at the costal break during collisions.

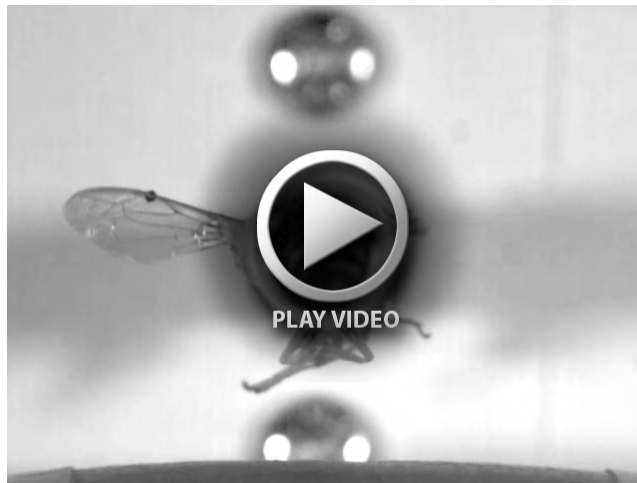

**Movie 2. A splinted yellowjacket wing subject to wing wear testing.** The glitter splint immobilizes the costal break, forcing the wing to bend more sharply towards the tip.

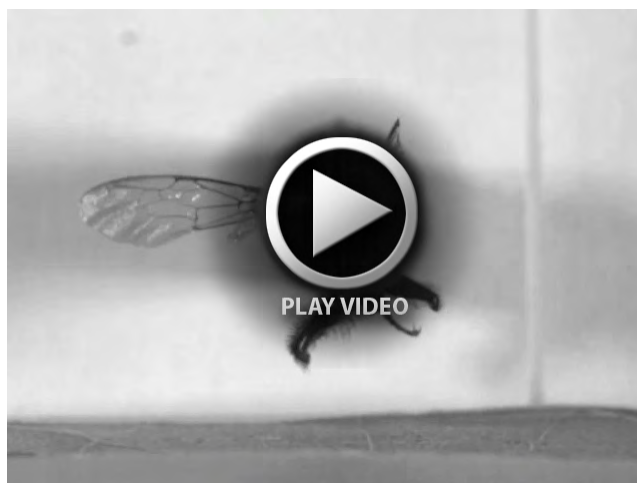

**Movie 3. A bumblebee wing subject to wing wear testing.**
